# Supplementary material for: Age- and Sex-Associated Pathogenesis of Cell Culture-Passaged Kemerovo Virus in IFNAR(−/−) Mice
Source: MDPI journal article supplement (doi:10.3390/ijms25063177), 2024-03-09
Supplement: s1 [file s1]

**Table S1.** Kemerovo virus (KEMV) genome: lengths of dsRNA genome segments, encoded proteins, 5' and 3' NCRs, terminal conserved sequences for KEMV smb1/Vero2/BSR3 (a) and KEMV Ps.IRE1 (b).

a)

| Segment    | Protein                                               | Accession | 5' NCR | 5' termini-----3' termini                                                                                                                                                                                                                              | 3' NCR |
|------------|-------------------------------------------------------|-----------|--------|--------------------------------------------------------------------------------------------------------------------------------------------------------------------------------------------------------------------------------------------------------|--------|
| 1: 3896 bp | VP1(Pol); 1285 AA; 145,956 Da                         | PP278971  | 11 bp  | 5' - GUAAAAUGUC-----UAAGGAUAC - 3'                                                                                                                                                                                                                     | 28 bp  |
| 2: 2792 bp | VP2(T2); 908 AA; 102,750 Da                           | PP278972  | 18 bp  | 5' - GUAAAACUUC-----UAAGGAUAC - 3'                                                                                                                                                                                                                     | 47 bp  |
| 3: 1934 bp | VP3(Cap); 632 AA; 72,416 Da                           | PP278973  | 5 bp   | 5' - GUAAAAUGUU-----AUAACUUAC - 3'                                                                                                                                                                                                                     | 26 bp  |
| 4: 1730 bp | VP4(OC1); 554 AA; 62,562 Da                           | PP278974  | 17 bp  | 5' - GUAAAAUCUUA-----CCAAGAUAC - 3'                                                                                                                                                                                                                    | 54 bp  |
| 5: 1719 bp | NS1(TuP); 529 AA; 60,037 Da                           | PP278975  | 39 bp  | 5' - GUAAAAAUUU-----UUAAGAUAC - 3'                                                                                                                                                                                                                     | 96 bp  |
| 6: 1667 bp | VP5(OC2); 537 AA; 59,444 Da                           | PP278976  | 22 bp  | 5' - GUAAAAUUUC-----AUAGGUUAC - 3'                                                                                                                                                                                                                     | 37 bp  |
| 7: 1197 bp | NS2(ViP); 368 AA; 40,934 Da                           | PP278977  | 45 bp  | 5' - GUAAAAUUUU-----AUAAGAUAC - 3'                                                                                                                                                                                                                     | 51 bp  |
| 8: 1183 bp | VP7(T13); 357AA; 39,479 Da                            | PP278978  | 18 bp  | 5' - GUAAAAUUCU-----AUAAGUUAC - 3'                                                                                                                                                                                                                     | 97 bp  |
| 9: 1049 bp | VP6(Hel); 317 AA; 34,198 Da<br>NS4; 151 AA; 17,622 Da | PP278979  | 58 bp  | 5' - GUAAAAUUC-----UAAAGAUAC - 3'                                                                                                                                                                                                                      | 43 bp  |
| 10: 707 bp | NS3; 214 AA; 23,410 Da<br>NS5; 62 AA; 7,743 Da        | PP278980  | 18 bp  | 5' - GUAAAAUUUC-----AUAGGAUAC - 3'                                                                                                                                                                                                                     | 50 bp  |
| Consensus  |                                                       |           |        | 5' - GUAAAA <sup>A</sup> / <sub>U</sub> <sup>G</sup> / <sub>U</sub> <sup>C</sup> / <sub>U</sub> <sup>---</sup> / <sub>A</sub> <sup>U</sup> / <sub>A</sub> <sup>A</sup> / <sub>G</sub> <sup>A</sup> / <sub>C</sub> <sup>A</sup> / <sub>U</sub> UAC - 3' |        |

b)

| Segment    | Protein                                               | Accession | 5' NCR | 5' termini-----3' termini                                                                                                                                                                                                                              | 3' NCR |
|------------|-------------------------------------------------------|-----------|--------|--------------------------------------------------------------------------------------------------------------------------------------------------------------------------------------------------------------------------------------------------------|--------|
| 1: 3896 bp | VP1(Pol); 1285 AA; 145,904 Da                         | PP278981  | 11 bp  | 5' - GUAAAAUGUC-----UAAGGAUAC - 3'                                                                                                                                                                                                                     | 28 bp  |
| 2: 2792 bp | VP2(T2); 908 AA; 102,750 Da                           | PP278982  | 18 bp  | 5' - GUAAAACUUC-----UAAGGAUAC - 3'                                                                                                                                                                                                                     | 47 bp  |
| 3: 1934 bp | VP3(Cap); 632 AA; 72,402 Da                           | PP278983  | 5 bp   | 5' - GUAAAAUGUU-----AUAACUUAC - 3'                                                                                                                                                                                                                     | 26 bp  |
| 6: 1667 bp | VP5(OC2); 537 AA; 59,444 Da                           | PP278984  | 22 bp  | 5' - GUAAAAUUUC-----AUAGGUUAC - 3'                                                                                                                                                                                                                     | 37 bp  |
| 7: 1197 bp | NS2(ViP); 368 AA; 40,934 Da                           | PP278985  | 45 bp  | 5' - GUAAAAUUUU-----AUAAGAUAC - 3'                                                                                                                                                                                                                     | 51 bp  |
| 8: 1183 bp | VP7(T13); 357AA; 39,507 Da                            | PP278986  | 18 bp  | 5' - GUAAAAUUCU-----AUAAGUUAC - 3'                                                                                                                                                                                                                     | 97 bp  |
| 9: 1049 bp | VP6(Hel); 317 AA; 34,198 Da<br>NS4; 151 AA; 17,622 Da | PP278987  | 58 bp  | 5' - GUAAAAUUC-----UAAAGAUAC - 3'                                                                                                                                                                                                                      | 43 bp  |
| Consensus  |                                                       |           |        | 5' - GUAAAA <sup>A</sup> / <sub>U</sub> <sup>G</sup> / <sub>U</sub> <sup>C</sup> / <sub>U</sub> <sup>---</sup> / <sub>A</sub> <sup>U</sup> / <sub>A</sub> <sup>A</sup> / <sub>G</sub> <sup>A</sup> / <sub>C</sub> <sup>A</sup> / <sub>U</sub> UAC - 3' |        |

AA: amino acid, Da: dalton, NCR: non-coding region.

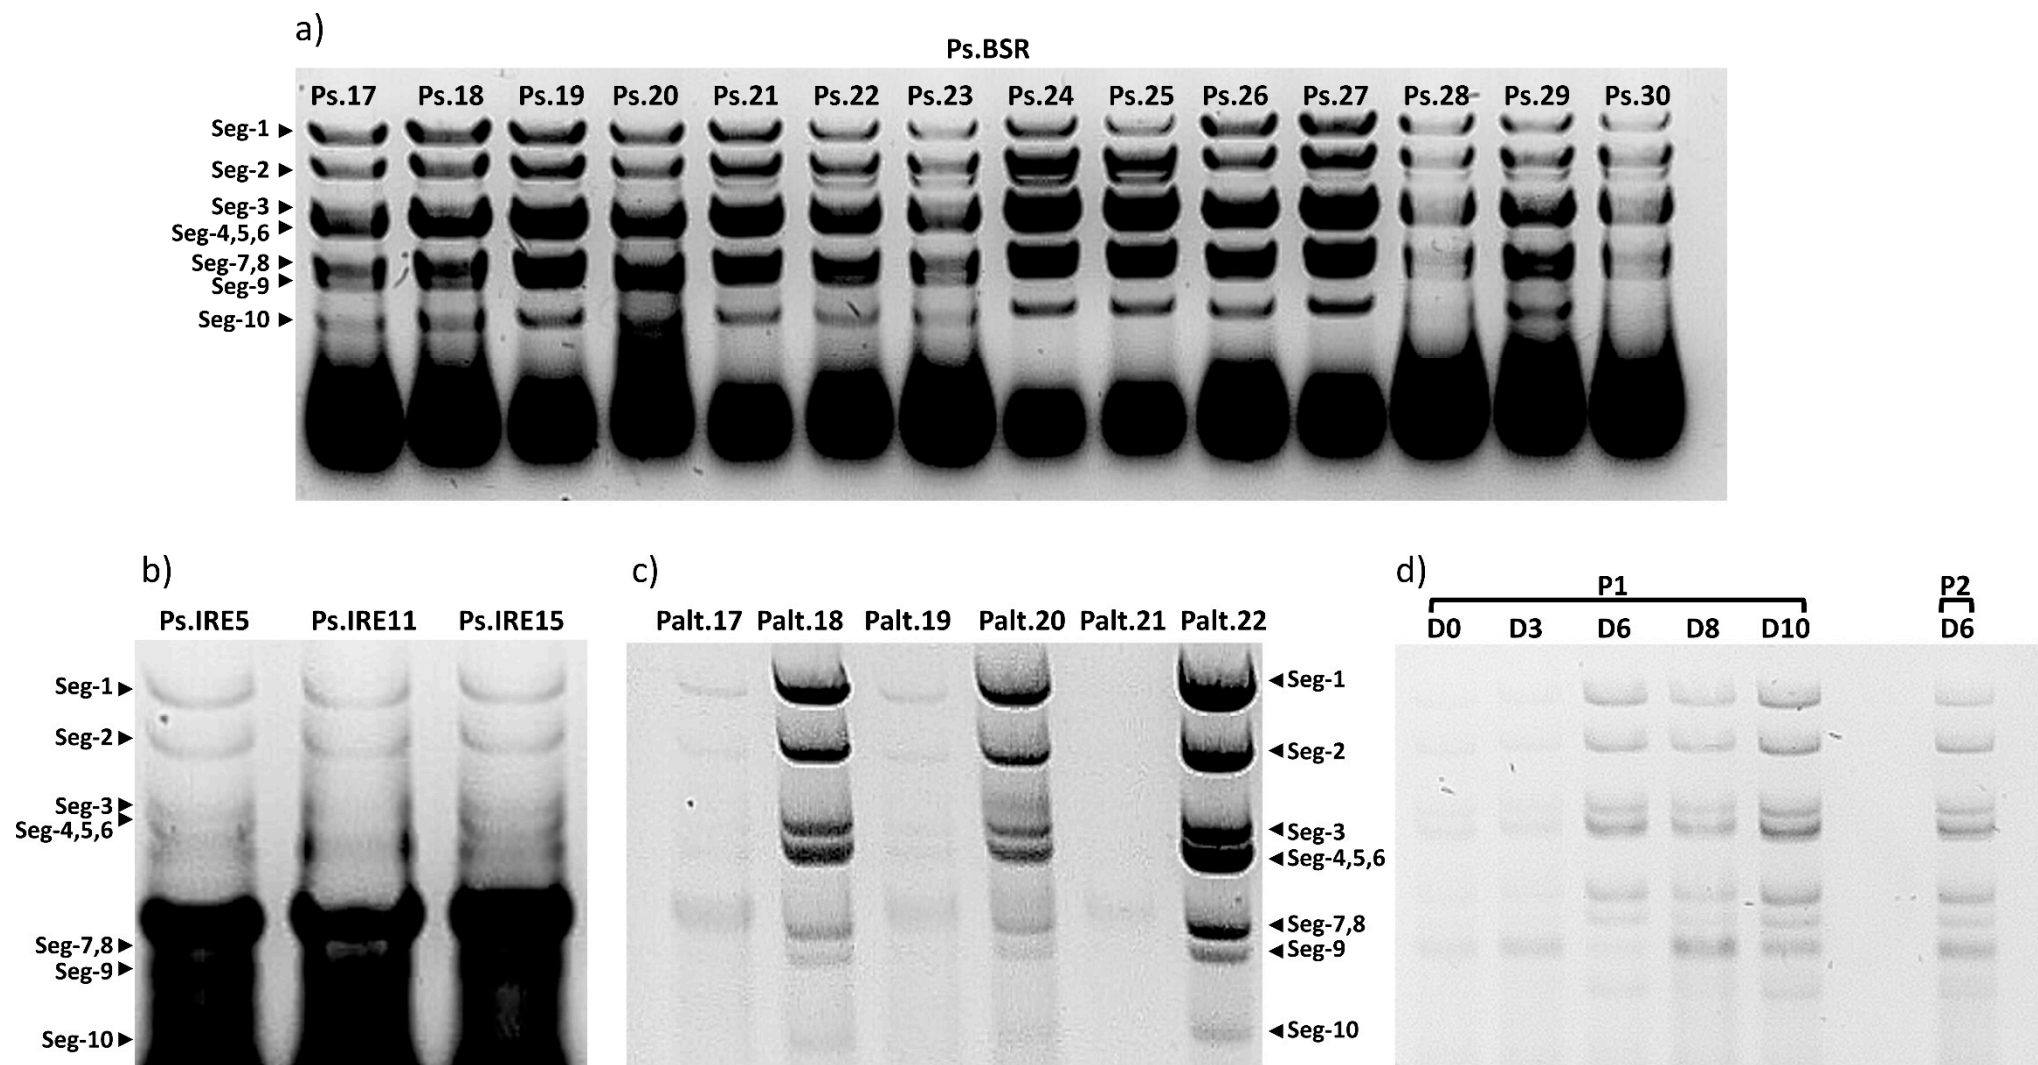

**Figure S1.** Electropherotypes of the Kemerovo virus (KEMV) dsRNA genome from various cell culture passages. dsRNA extracts were analysed by agarose gel electrophoresis (1% agarose in TAE buffer: 400 mM Tris-Acetate pH 8.0, 10 mM EDTA).

(a) dsRNA genome of KEMV that was serially passaged in BSR cells (Ps.BSR), (b) dsRNA genome of KEMV that was serially passaged in IRE/CTVM20 (Ps.IRE), (c) dsRNA genome of KEMV that was passaged by alternation between IRE/CTVM20 and BSR cells (P.alt).

(d) This gel shows the growth kinetics of KEMV in IRE/CTVM20. The cells were infected with KEMV and RNA extraction performed from cell pellets on days 0 (D0), 3 (D3), 6 (D6), 8 (D8) and 10 (D10). The maximum levels of dsRNA genome are reached between days 6 and 10. P1: passage 1 in IRE/CTVM20 and P2: passage 2 in IRE/CTVM20.

```

VP1BSR  MAVVEQRITSANNAIRILPNLPLKDDKTYHDYKYKSKWKDSKATARTTLHGVPVLSENSWRDI PRTTQTFRPRD
VP1IRE  MAVVEQRITSANNAIRILPNLPLKDDKTYHDYKYKSKWKDSKATARTTLHGVPVLSENSWRDI PRTTQTFRPRD
*****

VP1BSR  VVEYYRSQIPVVELQPEEEFLRNYSLDEKDAGPLLAFLRHRSQEEMAVYGDMLRHWYALVQQLSDDYGHAPL
VP1IRE  VVEYYRSQIPVVELQPEEEFLRNYSLDEKDAGPLLAFLRHRSQEEMAVYGDMLRHWYALVQQLSDDYGHAPL
*****

VP1BSR  GLACMERFIDDHGDPFHQSTRDLSKISDERYSSSVLFFEMSICEALHEFNVVLRRESGIPLTTRFGRQEVDR
VP1IRE  GLACMERFIDDHGDPFHQSTRDLSKISDERYSSSVLFFEMSICEALHEFNVVLRRESGIPLTTRFGRQEVDR
*****

VP1BSR  IAIVRELYTLMLTHPKVCNMLRASYSWFVKNWGIAAPEVNLESSESGDDRNSKDITFHRWRRVRNPYSIAIVLA
VP1IRE  IAIVRELYTLMLTHPKVCNMLRASYSWFVKNWGIAAPEVNLESSESGDDRNSKDITFHRWRRVRNPYSIAIVLA
*****

VP1BSR  TEFHKSSLRANLDKVEATAYASKLAGTPMELRVFRAMMANTYTTTFDPRDQSHLQLASLLLAIQTMAGYGRAW
VP1IRE  TEFHKSSLRANLDKVEATAYASKLAGTPMELRVFRAMMANTYTTTFDPRDQSHLQLASLLLAIQTMAGYGRAW
*****

VP1BSR  IVNAGDDPERMLKPSRDNHVTRVARETEKFFVKAYEEARMHGHDIIIPPEDMYSSLLRLAKNTSSGFSSTEVEVKK
VP1IRE  IVNAGDDPERMLKPSRDNHVTRVARETEKFFVKAYEEARMHGHDIIIPPEDMYSSLLRLAKNTSSGFSSTEVEVKK
*****

VP1BSR  KYGPAERDEIVRIKSRQKALYLMREGHKIYSPDMNMSYTTPTCYQTRGTRDVPIKATRTIAINNVNVLAPQH
VP1IRE  KYGPAERDEIVRIKSRQKALYLMREGHKIYSPDMNMSYTTPTCYQTRGTRDVPIKATRTIAINNVNVLAPQH
*****
Motif I

VP1BSR  YILTLPNEYFARAGGSTHPASSEIGGKIIIGDLEATGSRVMDAADTFRNTSDTGVWTLALDYSNYDTHMTQDN
VP1IRE  YILTLPNEYFARAGGSTHPASSEIGGKIIIGDLEATGSRVMDAADTFRNTSDTGVWTLALDYSNYDTHMTQDN
*****
Motif A

VP1BSR  FRRGMISGIRQAVARHHSLLKYEGLWSVDQLIEAGYGAGRVAGTLWNGKRRVCRMDRADYERLPLEDREVPDAPF
VP1IRE  FRRGMISGIRQAVARHHSLLKYEGLWSVDQLIEAGYGAGRVAGTLWNGKRRVCRMDRADYERLPLEDREVPDAPF
*****

VP1BSR  RFRPPGTSPIRSLALVKEARTLDFVLVTPWDGSDLARVSTHLSGENSTLVANSLNHMA MGRVIQDEVQTRHPGT
VP1IRE  RFRPPGTSPIRSLALVKEARTLDFVLVTPWDGSDLARVSTHLSGENSTLVANSLNHMA MGRVIQDEVQTRHPGT
*****
Motif B

VP1BSR  FEVLSEMYVDDTLHYVKLLTLDQAIDRAINTIFQTIELCGHEASAAKTTFAPFSAEKTQTHAKQGVYIPQDR
VP1IRE  FEVLSEMYVDDTLHYVKLLTLDQAIDRAINTIFQTIELCGHEASAAKTTFAPFSAEKTQTHAKQGVYIPQDR
*****
Motif C Motif D

VP1BSR  MMVISSERRKEIEDVQGYMRAQATTFTVTKVSRGFSDEL AHRILLKASLGYRRFKATIFDGTKFRRRKFFSEE
VP1IRE  MMVISSERRKEIEDVQGYMRAQATTFTVTKVSRGFSDEL AHRILLKASLGYRRFKATIFDGTKFRRRKFFSEE
*****

VP1BSR  DGYTLCRLNPAVLVYAPVECNQYGVHPFALNVVQTCETHLDSIQLFPTYADLVSRNVIRTAFAPPPWNETDVDSR
VP1IRE  DGYTLCRLNPAVLVYAPVECNQYGVHPFALNVVQTCETHLDSIQLFPTYADLVSGNVIRTAFAPPPWNETDVDSR
*****

VP1BSR  LLSTQTPMGLYSRIVRPTVRMALTPDIAALVTQIPLGEHAPDRLSSTMMHSALLKESRARALLAPAYEDRFIE
VP1IRE  LLSTQTPMGLYSRIVRPTVRMALTPDIAALVTQIPLGEHAPDRLSSTMMHSALLKESRARALLAPAYEDRFIE
*****

VP1BSR  SMNKWRPHDFKPTAGVELTAAYAKVLDLQISARDAPTPLFPDMNLSPAFLAQKQCVGHRTTVRPSRTYMDHID
VP1IRE  SMNKWRPHDFKPTAGVELTAAYAKVLDLQISARDAPTPLFPDMNLSPAFLAQKQCVGHRTTVRPSRTYMDHID
*****

VP1BSR  RILRGDVVMRGIIITANTIMTLEKIGFDHDPADLAIIFELLNLD RRVARRLAEFVTGDRLRFDVHALNKRIGIG
VP1IRE  RILRGDVVMRGIIITANTIMTLEKIGFDHDPADLAIIFELLNLD RRVARRLAEFVTGDRLRFDVHALNKRIGIG
*****

VP1BSR  DEFTMSLDVCTDGSRDQRITFPPEFTLAERDAALHAEQIQLLFAAHQGRSVRVALQVRPEHRSALRKARIKMR
VP1IRE  DEFTMSLDVCTDGSRDQRITFPPEFTLAERDAALHAEQIQLLFAAHQGRSVRVALQVRPEHRSALRKARIKMR
*****

VP1BSR  TPRLRVIRSAARAIRSASLALAEQGFL
VP1IRE  TPRLRVIRSAARAIRSASLALAEQGFL
*****

```

**Figure S2:** alignment of the amino acid sequences of the RNA-dependent RNA polymerase of parental KEMV smb1/Vero2/BSR3 (VP1BSR) and KEMV Ps.IRE1 (VP1IRE).

The 5 amino acid differences resulting from the 5 non-synonymous nucleotide mutations are highlighted in cyan. The motifs of the active polymerase site are shown in red, light-blue, green, purple and dark-blue letters and identified as motifs I, A, B, C and D. The asterisks denote identical amino acids.
